# Supplementary material
Source: PubMed Central journal article supplement (PMC9857824)
Supplement: jamacardiol-e225124-s001.pdf [file jamacardiol-e225124-s001.pdf]

## Supplemental Online Content

Hussain SM, Ebeling PR, Barker AL, Beilin LJ, Tonkin AM, McNeil JJ. Association of plasma high-density lipoprotein cholesterol level with risk of fractures in healthy older adults. *JAMA Cardiol*. Published online January 18, 2023. doi:10.1001/jamacardio.2022.5124

**eTable 1.** General characteristics of participants stratified by sex: overall, and by quintiles of HDL-C

**eTable 2.** Association between baseline non-HDL-C (mg/dL) and at least one fracture occurring after recruitment (HR, 95% CI)

**eTable 3.** Association between baseline HDL-C (mg/dL) and at least one fracture occurring after recruitment (HR, 95% CI)

**eTable 4.** Association between baseline HDL-C (mg/dL) and at least one fracture occurring after recruitment based on statin use status (HR, 95% CI)

This supplemental material has been provided by the authors to give readers additional information about their work.

eTable 1: General characteristics of participants stratified by sex: Overall, and by quintiles of HDL-C

|                                                | Overall   | Q1        | Q2-4      | Q5        | <i>P</i> Value |
|------------------------------------------------|-----------|-----------|-----------|-----------|----------------|
| <b>Males</b>                                   |           |           |           |           |                |
| N                                              | 7319      | 1976      | 4188      | 1155      |                |
| Participants with at least 1 fracture, n (%)   | 450 (6)   | 107 (5)   | 247 (6)   | 96 (8)    | <.001          |
| Types of fracture, n (%)                       |           |           |           |           | .012           |
| Minimal trauma fracture, n (%)                 | 192 (3)   | 43 (2)    | 111 (3)   | 38 (3)    |                |
| Other trauma fracture, n (%)                   | 258 (4)   | 64 (3)    | 136 (3)   | 58 (5)    |                |
| Age in years                                   | 75 (4)    | 75 (4)    | 75 (4)    | 76 (5)    | <.001          |
| Low activity, n (%)                            | 389 (5)   | 141 (7)   | 207 (5)   | 41 (3)    | <.001          |
| BMI (kg/m <sup>2</sup> ), mean (SD)            | 28 (4)    | 29 (4)    | 28 (4)    | 26 (34)   | <.001          |
| Waist Circumference (cm), mean (SD)            | 102 (11)  | 105 (10)  | 102 (10)  | 98 (10)   | <.001          |
| Current/former smoking, n (%)                  | 4164 (57) | 1081 (55) | 2371 (57) | 712 (62)  | <.001          |
| Current alcohol use, n (%)                     | 6254 (85) | 1542 (78) | 3643 (87) | 1060 (92) | <.001          |
| Education, n (%)                               |           |           |           |           | <.001          |
| <12 years of schooling                         | 4236 (58) | 1239 (63) | 2364 (57) | 633 (55)  |                |
| ≥12 years of schooling                         | 3083 (42) | 737 (37)  | 1824 (44) | 522 (45)  |                |
| Hypertension, n (%)                            | 5557 (76) | 1560 (79) | 3118 (75) | 879 (76)  | .001           |
| Chronic kidney disease (eGFR <60ml/min), n (%) | 1196 (17) | 452 (24)  | 614 (15)  | 130 (12)  | <.001          |
| Diabetes, n (%)                                | 869 (12)  | 389 (20)  | 402 (10)  | 78 (7)    | <.001          |
| Prefrail/Frail, n (%)                          | 2708 (37) | 783 (40)  | 1526 (36) | 399 (35)  | .009           |
| On trial medication, n (%)                     | 3656 (50) | 982 (50)  | 2066 (49) | 608 (53)  | .13            |
| Osteoporotic medication, n (%)                 | 143 (2)   | 35 (2)    | 72 (2)    | 36 (3)    | .008           |
| Total Cholesterol (mg/dL), mean (SD)           | 195 (36)  | 182 (36)  | 197 (34)  | 208 (34)  | <.001          |
| HDL-C (mg/dL), mean (SD)                       | 54 (15)   | 38 (5)    | 55 (6)    | 80 (10)   |                |
| Non-HDL-C (mg/dL), mean (SD)                   | 141 (35)  | 144 (36)  | 142 (34)  | 128 (34)  | <.001          |
| Lipid lowering medications, n (%)              | 2124 (31) | 642 (34)  | 1147 (29) | 335 (31)  | .002           |
| <b>Females</b>                                 |           |           |           |           |                |
| N                                              | 8945      | 2548      | 4892      | 1505      |                |
| Participants with at least 1 fracture, n (%)   | 1209 (14) | 305 (12)  | 660 (14)  | 244 (16)  | .001           |
| Types of fracture, n (%)                       |           |           |           |           | .004           |
| Minimal trauma fracture, n (%)                 | 519 (6)   | 124 (5)   | 290 (6)   | 105 (7)   |                |
| Other trauma fracture, n (%)                   | 690 (8)   | 181 (7)   | 370 (8)   | 139 (9)   |                |

|                                                | Overall    | Q1        | Q2-4      | Q5        | <i>P</i> Value |
|------------------------------------------------|------------|-----------|-----------|-----------|----------------|
| Age in years                                   | 75 (4)     | 75 (4)    | 75 (4)    | 76 (5)    | .10            |
| Low activity, n (%)                            | 655 (7)    | 241 (10)  | 337 (7)   | 77 (5)    | <.001          |
| BMI (kg/m <sup>2</sup> ), mean (SD)            | 28 (5)     | 30 (5)    | 28 (5)    | 26 (5)    | <.001          |
| Waist Circumference (cm), mean (SD)            | 93 (13)    | 98 (13)   | 92 (12)   | 87 (12)   | <.001          |
| Current/former smoking, n (%)                  | 3044 (34)  | 843 (33)  | 1612 (33) | 589 (39)  | <.001          |
| Current alcohol use, n (%)                     | 6590 (74)  | 1668 (66) | 3674 (75) | 1248 (83) | <.001          |
| Education, n (%)                               |            |           |           |           | <.001          |
| <12 years of schooling                         | 5719 (64)  | 1721 (68) | 3115 (64) | 883 (59)  |                |
| ≥12 years of schooling                         | 3225 (36)  | 827 (33)  | 1777 (36) | 621 (41)  |                |
| Hypertension, n (%)                            | 6639 (74)  | 2042 (80) | 3556 (73) | 1041 (69) | <.001          |
| Chronic kidney disease (eGFR <60ml/min), n (%) | 1677 (19)  | 577 (23)  | 873 (18)  | 227 (15)  | <.001          |
| Diabetes, n (%)                                | 719 (8)    | 373 (15)  | 288 (6)   | 58 (4)    | <.001          |
| Prefrail/Frail, n (%)                          | 3521 (39)  | 1053 (41) | 1873 (38) | 595 (40)  | .04            |
| On trial medication, n (%)                     | 4453 (50)  | 1266 (50) | 2428 (50) | 759 (50)  | 0.86           |
| Osteoporosis medication, n (%)                 | 953 (11)   | 210 (8)   | 534 (11)  | 209 (14)  | <.001          |
| Total Cholesterol (mg/dL), mean (SD)           | 211 (38)   | 199 (40)  | 213 (36)  | 227 (34)  | <.001          |
| HDL-C (mg/dL), mean (SD)                       | 67 (18)    | 48 (6)    | 68 (7)    | 96 (13)   |                |
| Non-HDL-C (mg/dL), mean (SD)                   | 144 (37.5) | 151 (40)  | 145 (37)  | 131 (34)  | <.001          |
| Lipid lowering medications, n (%)              | 3244 (37)  | 1087 (44) | 1697 (36) | 460 (32)  | <.001          |

Abbreviation: HDL-C, high density lipoprotein cholesterol; BMI, body mass index; GFR, glomerular filtration rate; SD, standard deviation

To convert cholesterol to mmol/L, multiply values by 0.0259.

eTable 2: Association between baseline non-HDL-C (mg/dL) and at least one fracture occurring after recruitment (HR, 95% CI)

|                                         | Non-HDL<br>(mg/dL)<br>continuous | Non-HDL-C quantiles |                   |                   |
|-----------------------------------------|----------------------------------|---------------------|-------------------|-------------------|
|                                         |                                  | Q1<br>(reference)   | Q2-Q4             | Q5                |
| All participants                        |                                  |                     |                   |                   |
| IR per 1000 PY<br>(95% CI)              | 26 (24, 27)                      | 28 (25, 31)         | 26 (24, 28)       | 23 (20, 26)       |
| Model 1 <sup>a</sup>                    | 0.92 (0.88, 0.97)                | 1                   | 0.96, 0.85, 1.08) | 0.85 (0.73, 0.99) |
| Model 2 <sup>b</sup>                    | 0.92 (0.88, 0.97)                | 1                   | 0.95 (0.85, 1.06) | 0.85 (0.72, 0.99) |
| Model 3 <sup>c</sup>                    | 0.92 (0.88, 0.97)                | 1                   | 0.96 (0.85, 1.08) | 0.85 (0.73, 0.99) |
| Model 4 <sup>d</sup>                    | 0.92 (0.87, 0.97)                | 1                   | 0.95 (0.83, 1.08) | 0.85 (0.71, 1.00) |
| Analyses stratified by sex <sup>e</sup> |                                  |                     |                   |                   |
| Males                                   |                                  |                     |                   |                   |
| IR per 1000 PY<br>(95% CI)              | 15 (14, 17)                      | 17 (14, 21)         | 16 (14, 18)       | 13 (10, 16)       |
| Model 1                                 | 0.92 (0.83, 1.02)                | 1                   | 0.89 (0.71, 1.12) | 0.72 (0.53, 0.97) |
| Model 2                                 | 0.92 (0.83, 1.01)                | 1                   | 0.89 (0.71, 1.12) | 0.72 (0.53, 0.97) |
| Model 3                                 | 0.92 (0.84, 1.02)                | 1                   | 0.89 (0.71, 1.12) | 0.72 (0.53, 0.97) |
| Model 4                                 | 0.91 (0.82, 1.02)                | 1                   | 0.87 (0.67, 1.11) | 0.71 (0.51, 0.98) |
| Females                                 |                                  |                     |                   |                   |
| IR per 1000 PY<br>(95% CI)              | 34 (32, 36)                      | 35 (31, 40)         | 35 (32, 37)       | 32 (28, 36)       |
| Model 1                                 | 0.93 (0.88, 0.98)                | 1                   | 0.98 (0.86, 1.13) | 0.90 (0.75, 1.08) |
| Model 2                                 | 0.92 (0.87, 0.98)                | 1                   | 0.98 (0.85, 1.12) | 0.90 (0.75, 1.07) |
| Model 3                                 | 0.93 (0.87, 0.98)                | 1                   | 0.98 (0.85, 1.13) | 0.90 (0.75, 1.08) |
| Model 4                                 | 0.92 (0.86, 0.98)                | 1                   | 0.98 (0.84, 1.15) | 0.91 (0.74, 1.11) |

Abbreviation: IR, Incidence Rate; PY, Person Year; BMI, body mass index;

<sup>a</sup> Model 1: adjusted for age, sex;

<sup>b</sup> Model 2: adjusted for age, sex, physical activity, alcohol use;

<sup>c</sup> Model 3: adjusted for age, sex, physical activity, alcohol use, prefrailty/frailty status; Model

<sup>d</sup> 4: adjusted for age, sex, physical activity, alcohol use, prefrailty, frailty status, education, BMI, smoking status, Aspirin, diabetes, chronic kidney disease, lipid lowering medication, OP medications;

<sup>e</sup> not adjusted for sex

eTable 3: Association between baseline HDL-C (mg/dL) and at least one fracture occurring after recruitment (HR, 95% CI)

|                                                                                                                                    | HDL (mg/dL)<br>continuous | HDL quantiles     |                   |                          |
|------------------------------------------------------------------------------------------------------------------------------------|---------------------------|-------------------|-------------------|--------------------------|
|                                                                                                                                    |                           | Q1<br>(reference) | Q2-Q4             | Q5                       |
| Minimal traumatic fractures (N=14764)                                                                                              |                           |                   |                   |                          |
| All                                                                                                                                | 1.10 (1.02, 1.20)         | 1                 | 1.22 (1.02, 1.48) | 1.42 (1.11, 1.81)        |
| Males <sup>a</sup>                                                                                                                 | 1.11 (0.94, 1.33)         | 1                 | 1.15 (0.80, 1.66) | 1.31 (0.82, 2.09)        |
| Females <sup>a</sup>                                                                                                               | 1.10 (1.00, 1.20)         | 1                 | 1.24 (1.01, 1.55) | 1.44 (1.09, 1.91)        |
| Participants not on osteoporotic medications <sup>b</sup> (N=15168)                                                                |                           |                   |                   |                          |
| All                                                                                                                                | 1.15 (1.09, 1.22)         | 1                 | 1.06 (0.93, 1.21) | 1.32 (1.12, 1.58)        |
| Males <sup>a</sup>                                                                                                                 | 1.22 (1.08, 1.38)         | 1                 | 1.04 (0.82, 1.32) | <b>1.41 (1.04, 1.91)</b> |
| Females <sup>a</sup>                                                                                                               | 1.13 (1.06, 1.21)         | 1                 | 1.07 (0.92, 1.25) | 1.30 (1.07, 1.58)        |
| Who never-smoked and reported that they did not drink alcohol <sup>c</sup> (N=2445)                                                |                           |                   |                   |                          |
| All                                                                                                                                | 1.22 (1.07, 1.40)         | 1                 | 1.10 (0.83, 1.45) | 1.59 (1.07, 2.35)        |
| Males <sup>a</sup>                                                                                                                 | 1.15 (0.75, 1.74)         | 1                 | 0.60 (0.29, 1.21) | 1.76 (0.72, 4.35)        |
| Females <sup>a</sup>                                                                                                               | 1.24 (1.08, 1.43)         | 1                 | 1.26 (0.92, 1.72) | 1.60 (1.03, 2.49)        |
| Who walked outside less than 30 minutes and reported no participation in moderate/vigorous physical activity <sup>d</sup> (N=5931) |                           |                   |                   |                          |
| All                                                                                                                                | 1.18 (1.09, 1.28)         | 1                 | 1.09 (0.90, 1.31) | 1.42 (1.11, 1.80)        |
| Males <sup>a</sup>                                                                                                                 | 1.13 (0.93, 1.39)         | 1                 | 0.96 (0.65, 1.42) | 1.31 (0.79, 2.18)        |
| Females <sup>a</sup>                                                                                                               | 1.18 (1.08, 1.29)         | 1                 | 1.12 (0.90, 1.34) | 1.45 (1.10, 1.90)        |

Adjusted for age, sex, physical activity, alcohol use, prefrailty, frailty status, education, body mass index, smoking status, Aspirin, diabetes, chronic kidney disease, lipid lowering medication, osteoporosis medications;

<sup>a</sup> not adjusted for sex;

<sup>b</sup> not adjusted for osteoporosis medications;

<sup>c</sup> not adjusted for smoking and alcohol use status;

<sup>d</sup> not adjusted for physical activity

eTable 4: Association between baseline HDL-C (mg/dL) and at least one fracture occurring after recruitment based on statin use status (HR, 95% CI)

|                                        | HDL (mg/dL)<br>continuous | HDL quantiles     |                   |                   |
|----------------------------------------|---------------------------|-------------------|-------------------|-------------------|
|                                        |                           | Q1<br>(reference) | Q2-Q4             | Q5                |
| Participants not on statins (n=10,170) |                           |                   |                   |                   |
| All                                    | 1.13 (1.06, 1.21)         | 1                 | 1.05 (0.90, 1.22) | 1.36 (1.11, 1.61) |
| Males <sup>a</sup>                     | 1.22 (1.07, 1.39)         | 1                 | 0.99 (0.74, 1.30) | 1.49 (1.05, 2.10) |
| Females <sup>a</sup>                   | 0.97 (0.81, 1.61)         | 1                 | 1.07 (0.99, 1.29) | 1.27 (1.02, 1.60) |
| Participants on statins (n=5368)       |                           |                   |                   |                   |
| All                                    | 1.16 (1.06, 1.27)         | 1                 | 1.17 (0.95, 1.43) | 1.27 (1.00, 1.67) |
| Males <sup>a</sup>                     | 1.19 (0.98, 1.47)         | 1                 | 1.27 (0.89, 1.95) | 1.21 (0.70, 2.23) |
| Females <sup>a</sup>                   | 1.15 (1.04, 1.27)         | 1                 | 1.14 (0.90, 1.43) | 1.29 (0.98, 1.77) |

Adjusted for age, sex, physical activity, alcohol use, prefrailty, frailty status, education, body mass index, smoking status, Aspirin, diabetes, chronic kidney disease, osteoporosis medications;

<sup>a</sup> not adjusted for sex;
