# Supplementary material
Source: PubMed Central journal article supplement (PMC9857824)
Supplement: jamacardiol-e225124-s002.pdf [file jamacardiol-e225124-s002.pdf]

## **Data Sharing Statement**

### **Data**

**Data available:** No

### **Additional Information**

**Explanation for why data not available:** Data can be obtained after communicating the corresponding author
